# Supplementary material
Source: Springer Nature journal article supplement (https://www.springermedizin.de/resource/supplementary/12982_2007_53_MOESM2_ESM.pdf/9604370)
Supplement: MOESM2 [file 9604370]

Bengali/বাংলা

সম্পাদকীয় প্রবন্ধ

ইংরেজী ভাষা ভাষী নয় এমন লোকদের জন্য অবাদ প্রবেশ পথ : ভাষাজনিত বাধার অতিক্রম

গ্রন্থকার: ইসাক চুন-হাই ফাং Isaac Chun-Hai FUNG

সারাংশ :

সাম্প্রতিক বৈজ্ঞানিক যোগাযোগের ক্ষেত্রে অবাদ প্রবেশের আন্দোলনের সাফল্যতার স্বত্বেও এই সম্পাদকীয় প্রবন্ধ ভাষাজনিত বাধার সমস্যাকে সকলের দৃষ্টিগোচর করে। ইংরেজী ভাষার সাময়িক পত্রিকায় এই বাধা অতিক্রমের চারটি উপায় উল্লেখ করা হয় :

- ১) লেখক বিভিন্ন ভাষায় প্রবন্ধের সারাংশ সরবরাহ করবে।
- ২) উইকি (Wiki) খোলা অনুবাদ।
- ৩) আন্তর্জাতিক অনুবাদ - সম্পাদকীয় সমিতি
- ৪) সাময়িক পত্রপত্রিকাগুলোতে বিভিন্ন ভাষায় প্রকাশনা।

``রোগবিস্তার বিদ্যার উদ্ভূত বিষয়বস্তু `` প্রকাশনা ঘোষণা করেছে যে অবিলম্বে লেখকের রচনার সম্পূর্ণ বা সারাংশের অনুবাদ তারা গ্রহন করবে।
